# Supplementary material for: Continuous production of amines directly from alkenes via cyclodextrin-mediated hydroaminomethylation using only water as the solvent
Source: Royal Society of Chemistry journal article supplement (doi:10.1039/d2gc04847g), 2023-01-01
Supplement: d2gc04847g1.pdf [file d2gc04847g1.pdf]

## Supporting Information

### Continuous production of amines directly from alkenes via cyclodextrin-mediated hydroaminomethylation using only water as the solvent

Authors: Thomas Roth<sup>1</sup>, Rebecca Evertz<sup>1</sup>, Niklas Kopplin<sup>1</sup>, Sébastien Tilloy<sup>2</sup>, Eric Monflier<sup>2</sup>, Dieter Vogt<sup>1</sup> and Thomas Seidensticker<sup>1\*</sup>

<sup>1</sup>TU Dortmund University, Department for Biochemical and Chemical Engineering, Laboratory of Industrial Chemistry, Emil-Figge-Straße 66, 44227 Dortmund, Germany

<sup>2</sup>University Artois, CNRS, Centrale Lille, Univ. Lille, UMR 8181 – UCCS – Unité de Catalyse et Chimie du Solide, F-62300 Lens, France

\*Mail: [thomas.seidensticker@tu-dortmund.de](mailto:thomas.seidensticker@tu-dortmund.de), Tel: +49 231 755 2310, Web: <https://tc.bci.tu-dortmund.de/>

#### Table of Contents

|                                                                                                 |    |
|-------------------------------------------------------------------------------------------------|----|
| Product Identification .....                                                                    | S2 |
| Batch Experiments .....                                                                         | S3 |
| Recycling experiment.....                                                                       | S3 |
| Increased CD- Concentration:.....                                                               | S5 |
| Additional Results: Reducing Catalyst concentration at high Cyclodextrine Concentrations: ..... | S5 |
| Continuous Experiments.....                                                                     | S6 |
| First continuous experiment.....                                                                | S6 |
| Second continuous experiment .....                                                              | S6 |
| Third continuous experiment .....                                                               | S7 |
| Detection of CD loss to product phase <i>via</i> MS: .....                                      | S7 |
| Calibration:.....                                                                               | S8 |

## Product Identification

The measurement of NMR spectra was recorded with a 400 MHz spectrometer type BRUKER DVANCE III HD NANOBAAY. Deuterated chloroform was used as the solvent for the samples.

$^1\text{H-NMR}$  (400 MHz,  $\text{CDCl}_3$ ):  $\delta = 0.87$  (t, 3H,  $\text{CH}_3$ ), 1.01 (t, 6H,  $\text{CH}_3$ ), 1.26 (m, 12H,  $\text{CH}_2$ ), 1.43 (m, 2H,  $\text{CH}_2$ ), 2.40 (m, 2H,  $\text{CH}_2$ ), 2.52 (q, 4H,  $\text{CH}_2$ )

$^{13}\text{C-NMR}$  (400MHz,  $\text{CDCl}_3$ ) for the main product N,N,diethylnonylamine:  $\delta = 11.78, 14.25, 22.82, 27.09, 27.90, 29.45, 29.75, 29.8, 32.04, 47.03, 53.16$

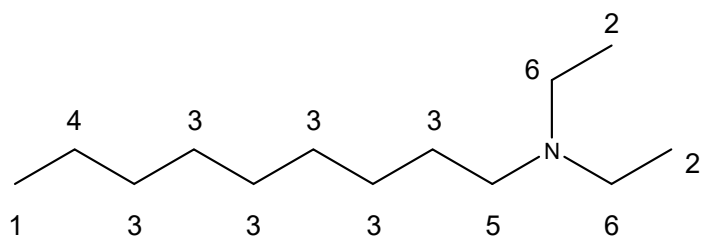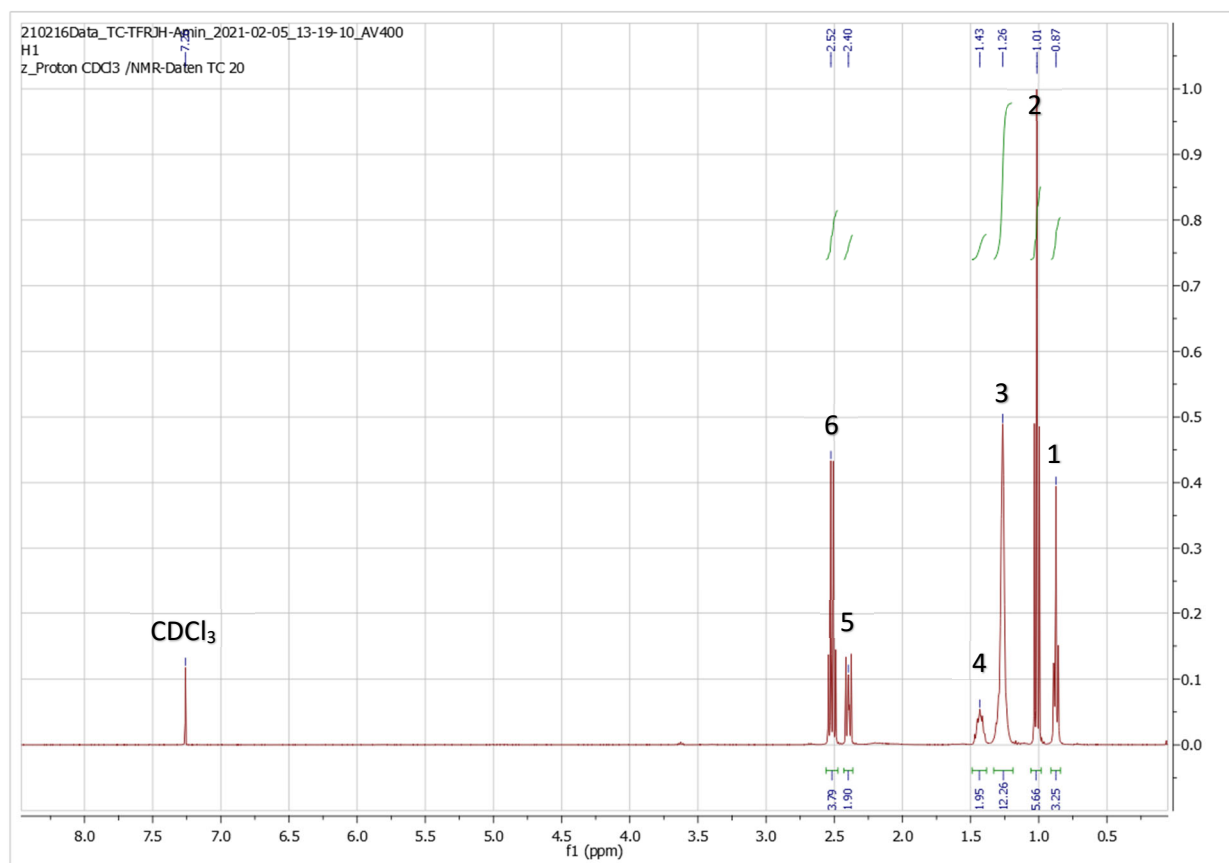

Figure S1:  $^1\text{H-NMR}$  (400MHz,  $\text{CDCl}_3$ ) for the main product N,N,diethylnonylamine:

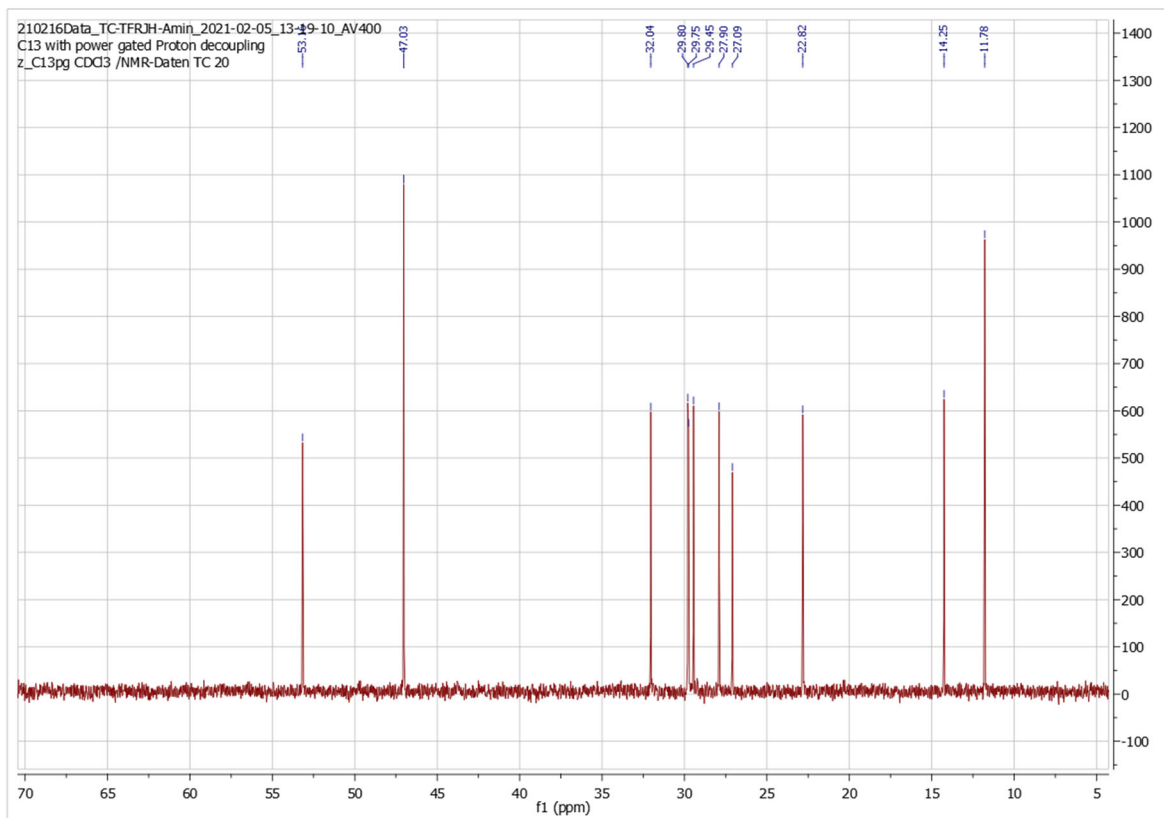

Figure S2:  $^{13}\text{C}$  NMR (400MHz,  $\text{CDCl}_3$ ) for the main product N,N-diethylnonylamine.

## Batch Experiments

### Recycling experiment

The reaction temperature was set to 120 °C, with a pressure of 30 bar and a molar ratio of hydrogen to carbon monoxide of 2:1. The organic volume fraction  $\varphi$  was 0.2. The molar ratio of catalyst to ligand to CD was set to 1:7:15, and mixing was assured using a pitched blade stirrer set to 800 rpm combined with a baffle system. The catalyst preforming time was set to 2 h, and the reaction time was decreased from 30 h to 24 h compared to the referenced publication.

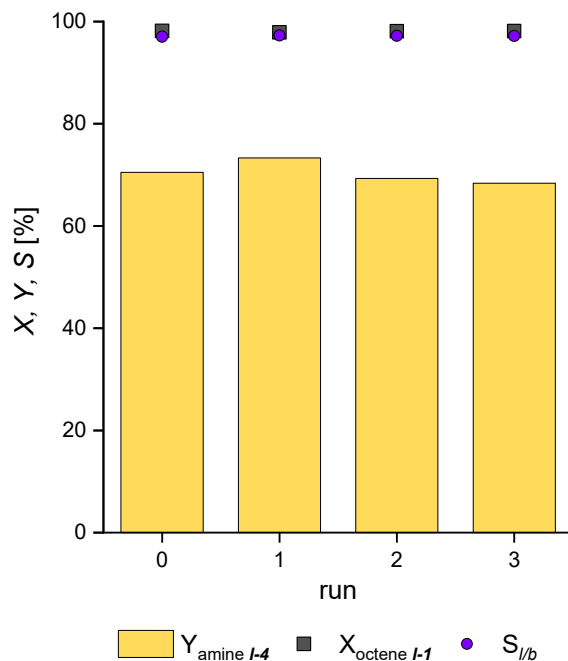

Figure S3: Recycle experiments for the hydroaminomethylation of octene **I-1** with diethylamine. Conditions:  $T = 120\text{ }^{\circ}\text{C}$ ;  $p = 35\text{ bar}$ ;  $n_{\text{CO}}/n_{\text{H}_2} = 1:2$ ;  $u = 800\text{ rpm}$ ;  $c_{\text{Rh}} = 3.2\text{ mmol L}^{-1}$ ;  $n_{\text{P}}:n_{\text{Rh}} = 7$ ;  $V_{\text{liq.}} = 100\text{ ml}$ ;  $\varphi = 0.2$ ;  $n_{\text{DEA}}:n_{\text{I-1}} = 1.5$ ;  $n_{\text{CD}}:n_{\text{Rh}} = 15$ ;  $t = 24\text{ h}$ ;  $n_{\text{I-1, per run}} = 0.117\text{ mol}$ ; preforming<sub>run0</sub>:  $T = 120\text{ }^{\circ}\text{C}$ ;  $p = 30\text{ bar}$ ;  $n_{\text{CO}}/n_{\text{H}_2} = 1:1$ ;  $u = 800\text{ rpm}$ ;  $t = 2\text{ h}$ .

Table S1: ICP-OES measurements of organic phase after the recycle experiments for the hydroaminomethylation of 1-octene with diethylamine. Leaching of catalyst and ligand were calculated based on the remaining masses after the previous run.

| Run:                |       | 0    | 1    | 2    | 3    |
|---------------------|-------|------|------|------|------|
| w <sub>Rh,org</sub> | [ppm] | 1    | 1    | 1    | 1    |
| L <sub>Rh</sub>     | [%]   | 0,21 | 0,21 | 0,21 | 0,22 |
| w <sub>P,org</sub>  | [ppm] | 8    | 6    | 7    | 7    |
| L <sub>P</sub>      | [%]   | 0,25 | 0,19 | 0,22 | 0,22 |

### Increased CD-concentration:

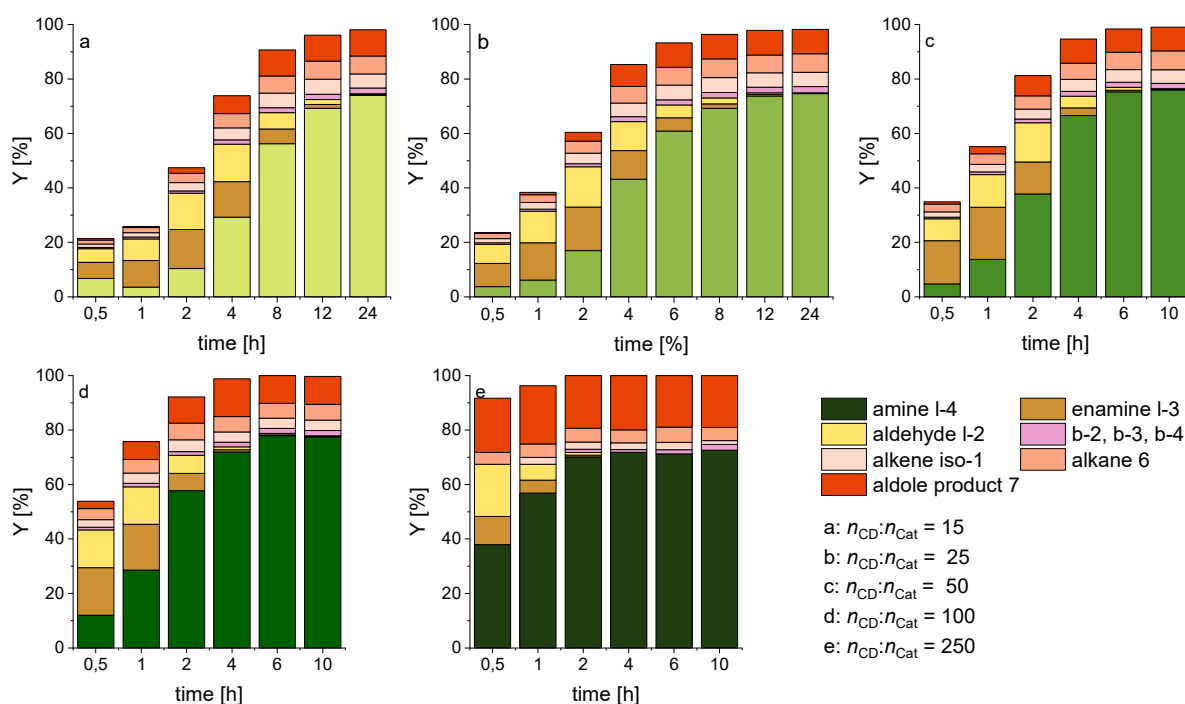

Figure S4: Yield over time for the HAM in dependency of the CD to catalyst ratio as presented in Figure 5 in the main part. Conditions:  $T = 120\text{ }^{\circ}\text{C}$ ;  $p = 35\text{ bar}$ ;  $n_{CO}/n_{H_2} = 1:2$ ;  $u = 800\text{ rpm}$ ;  $c_{Rh} = 3.2\text{ mmol L}^{-1}$ ;  $n_P:n_{Rh} = 7$ ;  $\varphi = 0.2$ ;  $n_{DEA}:n_{1\text{ Alkene}} = 1.5$ ;  $n_{CD}:n_{Rh} = 50\text{ to }250$ ; preforming:  $T = 120\text{ }^{\circ}\text{C}$ ;  $p = 35\text{ bar}$ ;  $n_{CO}/n_{H_2} = 1:1$ ;  $u = 800\text{ rpm}$ ;  $t > 12\text{ h}$

### Additional Results: Reducing catalyst concentration at high cyclodextrine Concentrations:

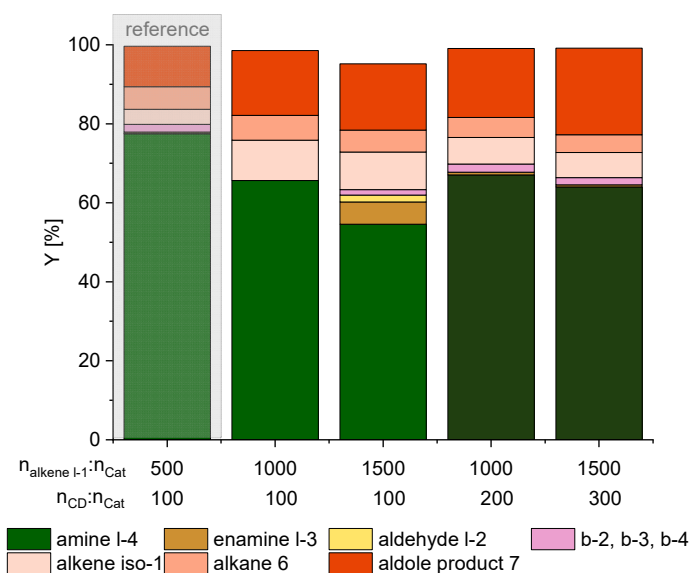

Figure S5: Yield over time for various substrate to catalyst and cyclodextrine to Catalyst ratios of the hydroaminomethylation of 1- octene with diethylamine. Conditions:  $T = 120\text{ }^{\circ}\text{C}$ ;  $p = 35\text{ bar}$ ;  $n_{CO}/n_{H_2} = 1:2$ ;  $n = 800\text{ rpm}$ ;  $c_{Rh} = 1.1\text{ to }3.2\text{ mmol L}^{-1}$ ;  $n_P:n_{Rh} = 7$ ;  $\varphi = 0.2$ ;  $n_{DEA}:n_{1\text{ Alkene}} = 1.5$ ;  $t = 10\text{ h}$ ; preforming:  $T = 120\text{ }^{\circ}\text{C}$ ;  $p = 35\text{ bar}$ ;  $n_{CO}/n_{H_2} = 1:1$ ;  $n = 800\text{ rpm}$ ;  $t > 12\text{ h}$

## Continuous Experiments

### First continuous experiment

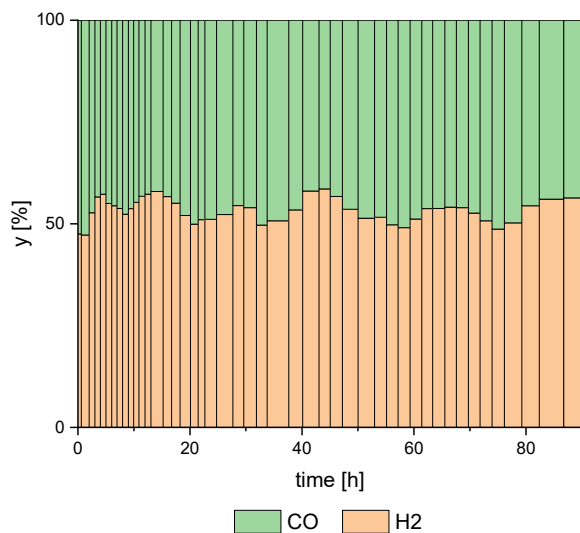

Figure S6: Mole fraction of gasses in reactor during the first continuous experiment.

### Second continuous experiment

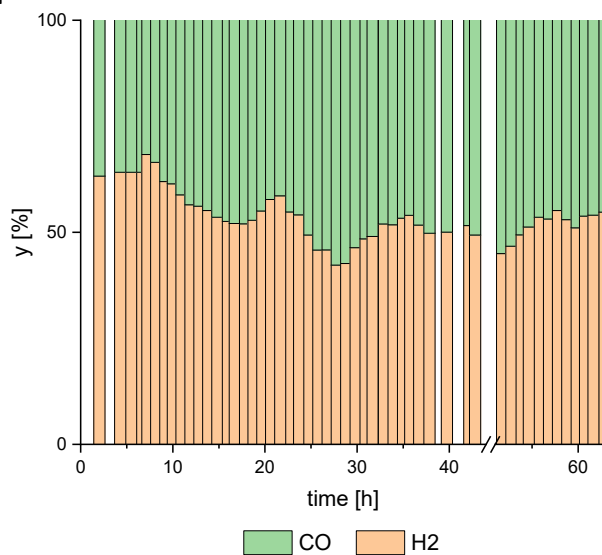

Figure S7: Mole fraction of gasses in reactor during the second continuous experiment.

### Third continuous experiment

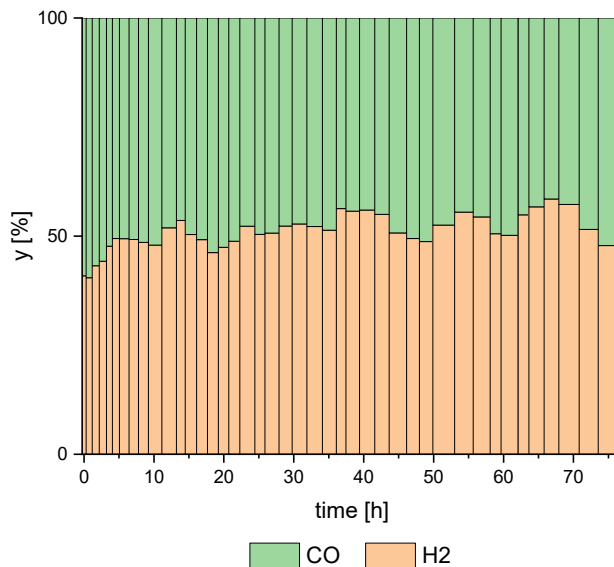

Figure S8: Mole fraction of gasses in reactor during the third continuous experiment.

### Detection of CD loss to product phase *via* MS:

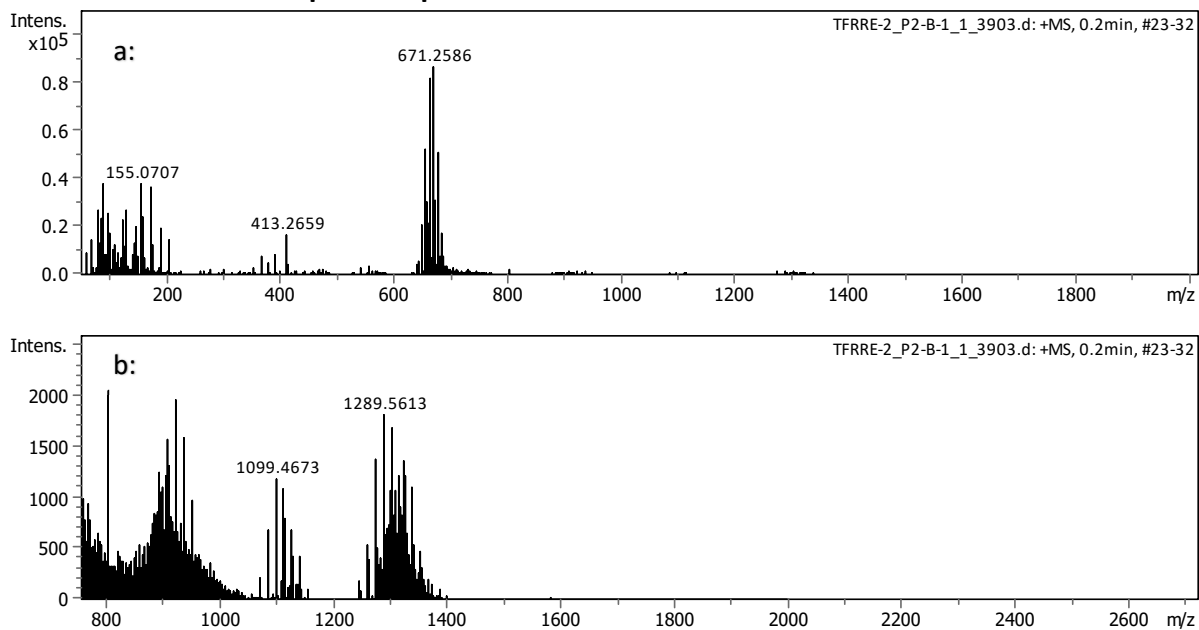

Figure S9: Mass spectrum of a reference aqueous solution with CD concentration of .1mg/ml. a: whole spectrum, b: zoomed in lower intensities

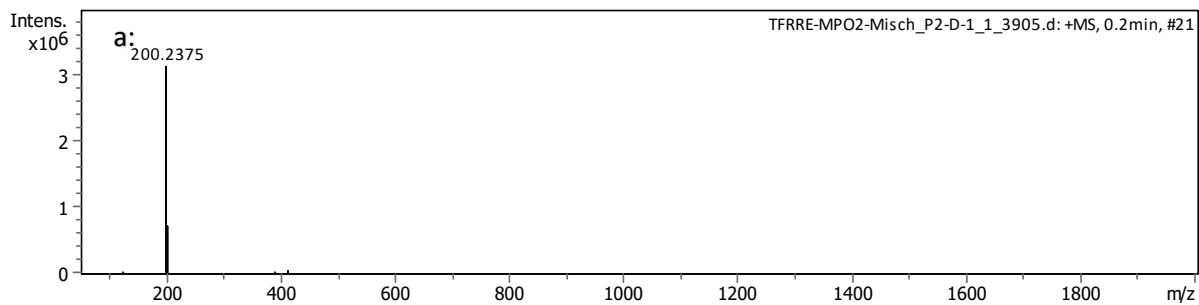

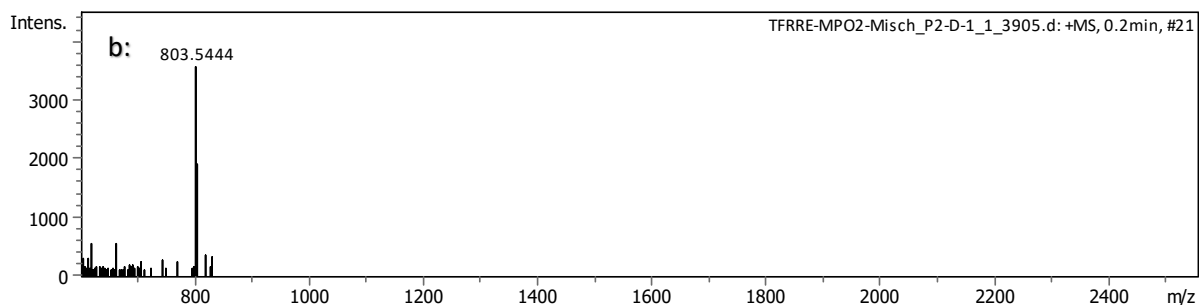

Figure S10: Mass spectrum product solution of third continuous experiment. a: whole spectrum, b: zoomed in lower intensities

### Calibration:

Analysis of product mixtures was done with a gas chromatography by Agilent Technologies (7890A) with a flame ionization detector and a capillary column type HP-5 (30m x 0.32mm x 0.25 $\mu$ m). For this purpose, 0.6 g of Tetrahydrofuran as the solvent, 0.05 of di-*n*-butylether as the internal standard, and 0.35 g of sample were used.

Table S2: Heat profile for the GC-FID analysis.

|                          | Rate [°C/min] | Target Value [°C] | Hold Time [min] |
|--------------------------|---------------|-------------------|-----------------|
| <b>T<sub>Start</sub></b> |               | 40                | 3               |
| <b>Ramp 1</b>            | 7.5           | 150               | 0               |
| <b>Ramp 2</b>            | 40            | 320               | 0               |
| <b>T<sub>End</sub></b>   |               | 320               | 8               |

Table S3: Retention times and response factors for the GC- FID analysis.

| Spezies                     | Retention Time [min] | Response Factor |
|-----------------------------|----------------------|-----------------|
| <i>DEA</i> , Diethylamin    | 1.77                 | 1.0483          |
| <i>I-1</i> , 1-Octen        | 4.26                 | 1.3434          |
| <b>6</b> , Octan            | 4.43                 | 1.3642          |
| <i>iso-1</i> , Iso- Octen   | 4.58- 4.74           | 1.3434          |
| <i>b-2</i> , b-Nonanal      | 10.4                 | 0.8928          |
| <i>I-2</i> , I-Nonanal      | 11.25                | 0.8928          |
| Nonanol                     | 12.4                 | 0.9516          |
| <i>b-4</i> , b-amine        | 12.56                | 0.9603          |
| <i>b-3</i> , b-enamine      | 14.65                | 0.9603          |
| <i>I-4</i> , I-amine        | 15.92                | 0.9603          |
| <i>I-3</i> , I-enamine      | 16.79                | 0.9603          |
| <b>7</b> , aldol condensate | 20.0-21.5            | 0.6377          |
